# Supplementary material for: Measures of Adrenal and Gonadal Hormones in Relation to Biological and Management Factors among Captive Red Pandas in Indian Zoos
Source: MDPI journal article supplement (doi:10.3390/ani13081298), 2023-04-10
Supplement: s1 [file s1]

---

Article

# Measures of Adrenal and Gonadal Hormones in Relation to Biological and Management Factors among Captive Red Pandas in Indian Zoos

Aamer Sohel Khan <sup>1</sup>, Janine Brown <sup>2</sup>, Vinod Kumar <sup>3</sup>, Govindhaswamy Umapathy <sup>3</sup> and Nagarajan Baskaran<sup>1, \*</sup>

<sup>1</sup> Mammalian Biology Lab, Department of Zoology and Wildlife Biology, Anbanathpuram Vahaira Charity (A.V.C.) College (Autonomous), Mannampandal, Mayiladuthurai 609305, Tamil Nadu, India; khannaamirsohel@gmail.com

<sup>2</sup> Smithsonian National Zoo and Conservation Biology Institute, Center for Species Survival, Front Royal, VA 22630, USA; brownjan@si.edu

<sup>3</sup> Laboratory for the Conservation of Endangered Species, CSIR-Center for Cellular and Molecular Biology, Habsiguda, Hyderabad 500007, Telangana, India; vinod@ccmb.res.in (V.K.); guma@ccmb.res.in (G.U.)

\* Correspondence: nagarajan.baskaran@gmail.com; Tel.: +91-4364-8903410794

**Supplementary Table S1:** Red pandas sampled in three zoos, their demographic and enclosures details.

| Place | Red Panda ID | Age | Age class/sex | Sociality            | Breeding history | Enclosure area (m <sup>2</sup> ) | Enclosure type* | Nest No. | Individuals sampled for fGCM/fAM or fPM |
|-------|--------------|-----|---------------|----------------------|------------------|----------------------------------|-----------------|----------|-----------------------------------------|
| Zoo 1 | RP1          | 4   | AF            | Paired               | No               | 3068                             | Open            | 2        | Yes / Yes                               |
| Zoo 1 | RP2          | 6   | AF            | Paired               | No               | 192                              | Open            | 3        | Yes / Yes                               |
| Zoo 1 | RP3          | 17  | AM            | Paired               | Yes              | 192                              | Open            | 3        | Yes / Yes                               |
| Zoo 1 | RP4          | 3   | AM            | Paired               | Yes              | 1560                             | Open            | 2        | Yes / Yes                               |
| Zoo 1 | RP5          | 5   | AF            | Paired               | Yes              | 1560                             | Open            | 2        | Yes / Yes                               |
| Zoo 1 | RP6          | 5   | AM            | Paired               | Yes              | 1560                             | Open            | 2        | Yes / Yes                               |
| Zoo 1 | RP7          | 8   | AF            | Paired               | Yes              | 495                              | Open            | 3        | Yes / Yes                               |
| Zoo 1 | RP8          | 3   | AF            | Paired               | Yes              | 2925                             | Open            | 3        | Yes / Yes                               |
| Zoo 1 | RP9          | 7   | AF            | Female with one cub  | Yes              | 2925                             | Open            | 3        | Yes / Yes                               |
| Zoo 1 | RP10         | 0.6 | CF            | Female with one cub  | -                | 2925                             | Open            | 3        | Yes / No                                |
| Zoo 1 | RP11         | 3   | AM            | Solitary             | No               | 350                              | Open            | 1        | Yes / Yes                               |
| Zoo 1 | RP12         | 11  | AF            | Female with two cubs | Yes              | 322                              | Open            | 3        | Yes / Yes                               |
| Zoo 1 | RP13         | 0.8 | CF            | Female with two cubs | -                | 322                              | Open            | 3        | Yes / No                                |
| Zoo 1 | RP14         | 0.8 | CM            | Female with two cubs | -                | 322                              | Open            | 3        | Yes / No                                |
| Zoo 1 | RP15         | 8   | AF            | Paired               | No               | 462                              | Open            | 2        | Yes / Yes                               |
| Zoo 1 | RP16         | 8   | AM            | Paired               | Yes              | 462                              | Open            | 2        | Yes / Yes                               |
| Zoo 1 | RP17         | 3   | AM            | Paired               | Yes              | 400                              | Open            | 3        | Yes / Yes                               |
| Zoo 2 | RP18         | 7   | AF            | Female with two cubs | Yes              | 2463                             | Open            | 1        | Yes / Yes                               |
| Zoo 3 | RP19         | 16  | AM            | Paired               | Yes              | 224                              | Closed          | 4        | Yes / Yes                               |
| Zoo 3 | RP20         | 4   | AF            | Paired               | Yes              | 224                              | Closed          | 4        | Yes / Yes                               |

\*Open – enclosures were only fenced with open top, closed – enclosures were netted from all sides.

**Supplementary Table S2:** Details of female's breeding rate since age of maturity and their fGCM and fPM concentration during the study

| ID (Age)  | Mean<br>fGCM ng/g | Mean<br>fPM µg/g | Breeding rate<br>(a/b*100) <sup>#</sup> |
|-----------|-------------------|------------------|-----------------------------------------|
| RP1 (4)   | 47                | 0.573            | 0                                       |
| RP2 (6)   | 62                | 0.069            | 0                                       |
| RP5 (5)   | 32                | 0.262            | 25                                      |
| RP7 (8)   | 41                | 0.310            | 42.9                                    |
| RP8 (3)   | 17                | 0.362            | 100                                     |
| RP9 (7)   | 27                | 0.554            | 33.3                                    |
| RP12 (11) | 27                | 0.756            | 33.3                                    |
| RP15 (8)  | 53                | 1.303            | 0                                       |
| RP20 (4)  | 38                | 17.986           | 75                                      |

<sup>#</sup>a – Number of liters produced since age of maturity, b – Total breeding age
